# Supplementary figures and images for: Dissecting Tissue-Specific Transcriptomic Responses from Leaf and Roots under Salt Stress in Petunia hybrida Mitchell
Source: MDPI journal article supplement (doi:10.3390/genes8080195), 2017-08-03

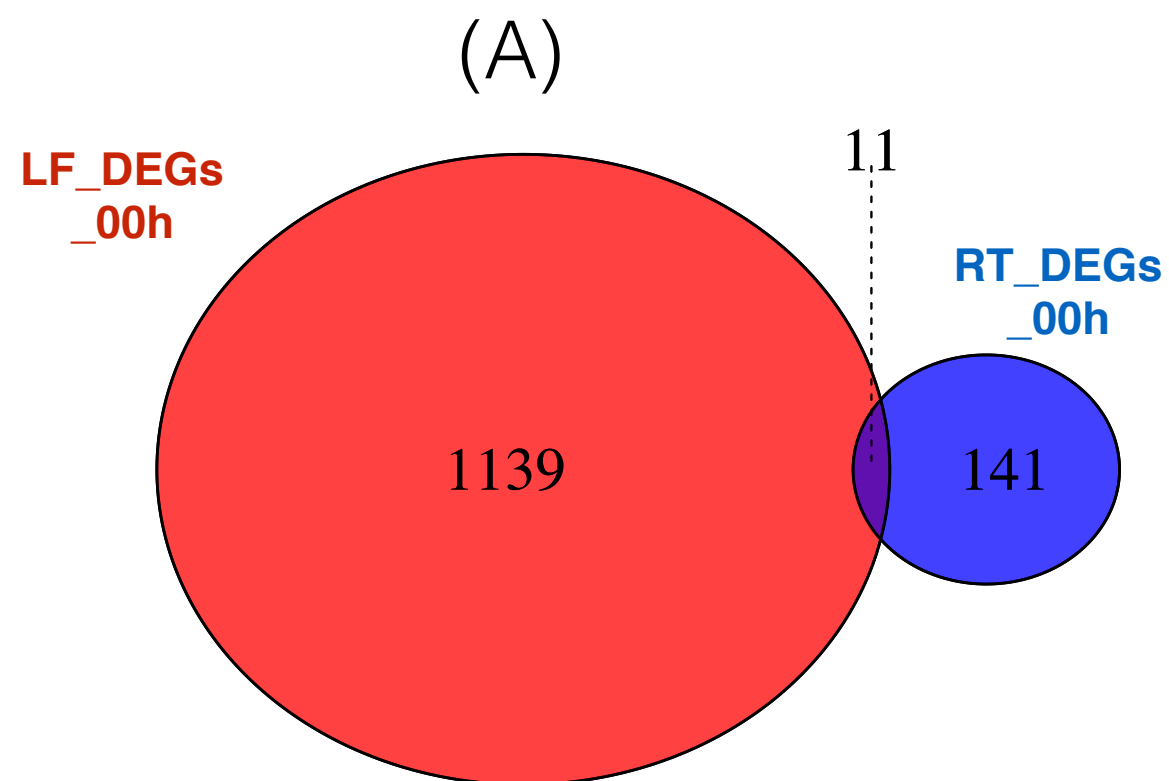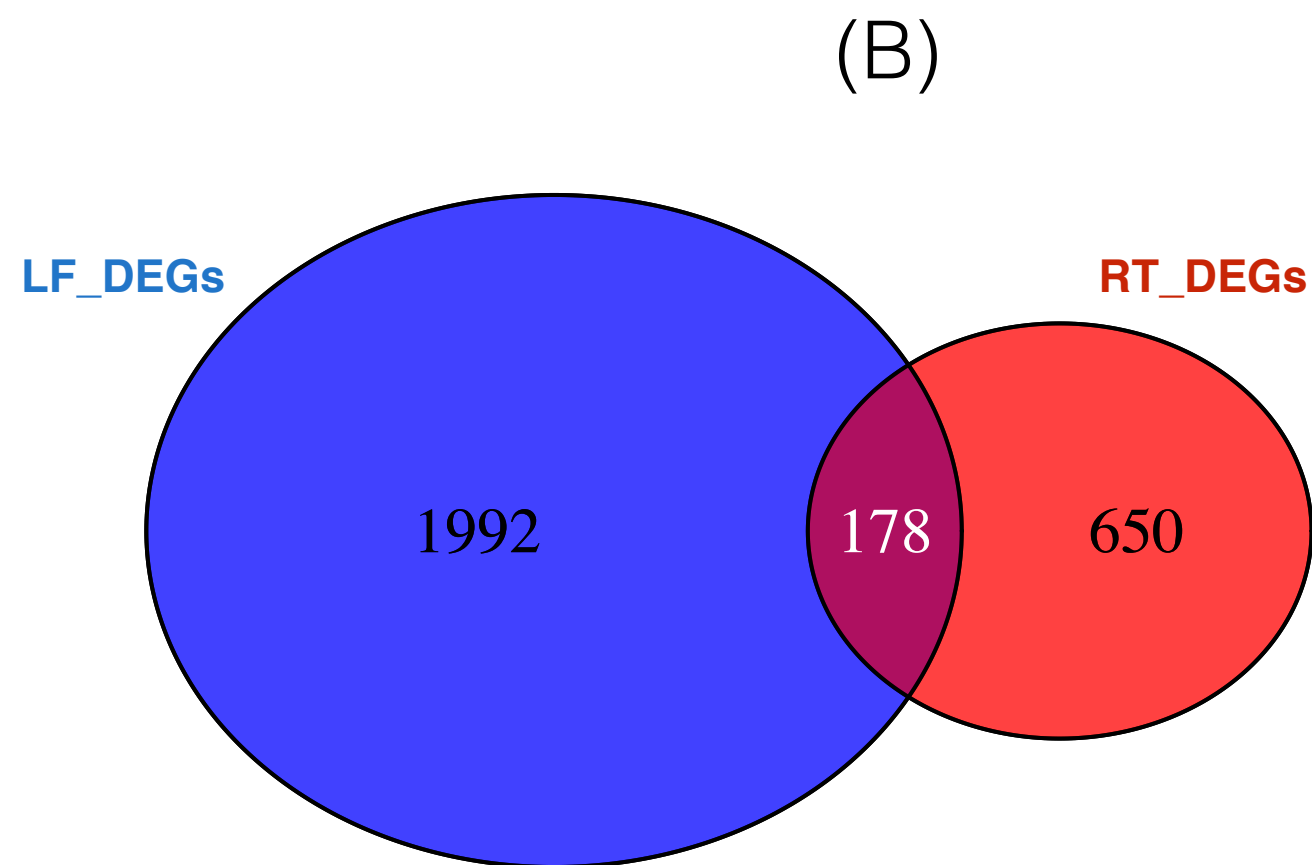

“Union”

“Intersection”

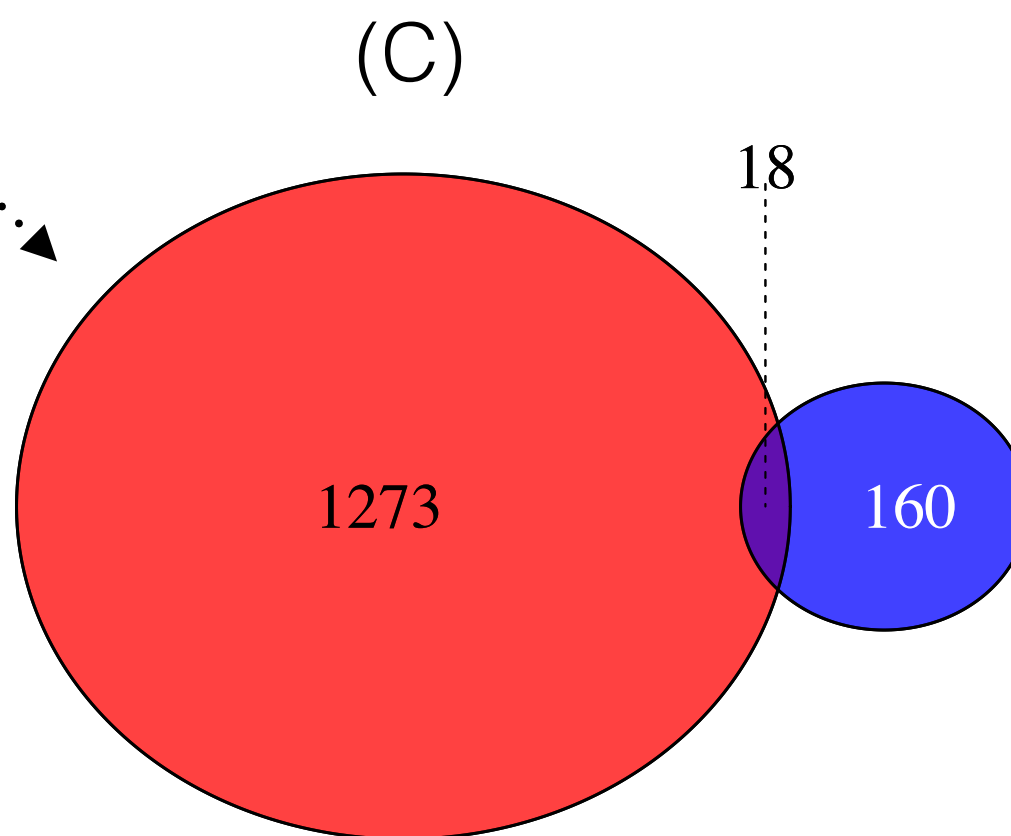

Supplement: s1 [file s1]

LF\_00h

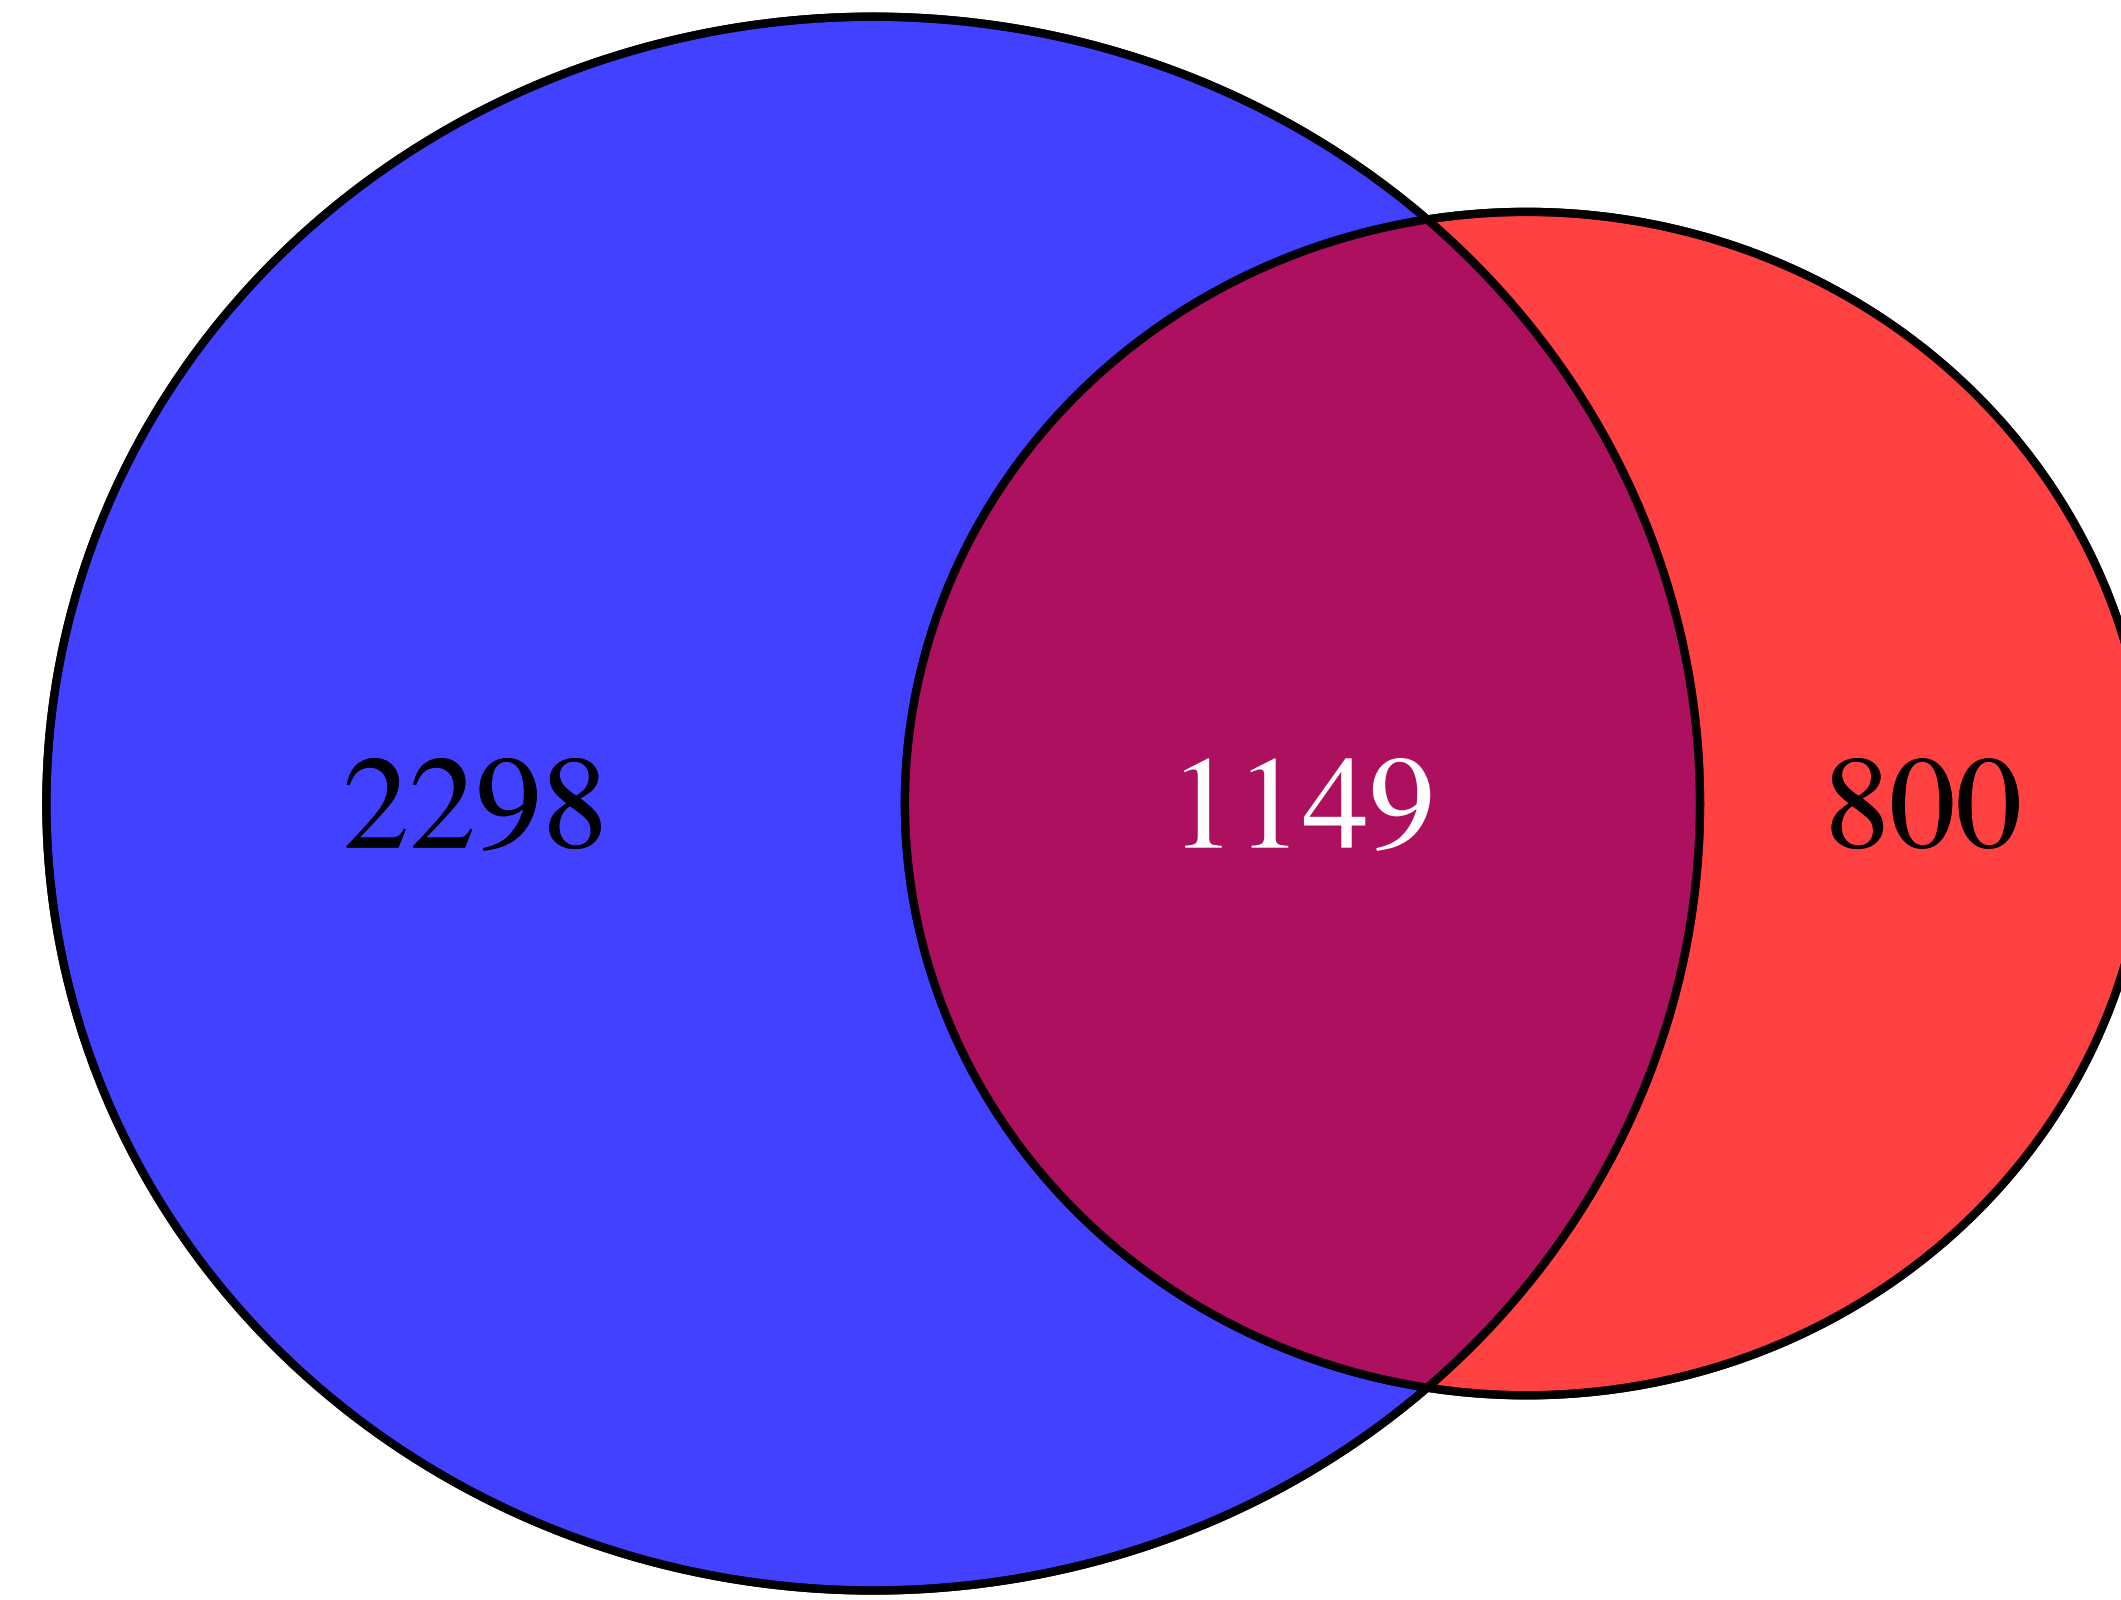

LF\_06h

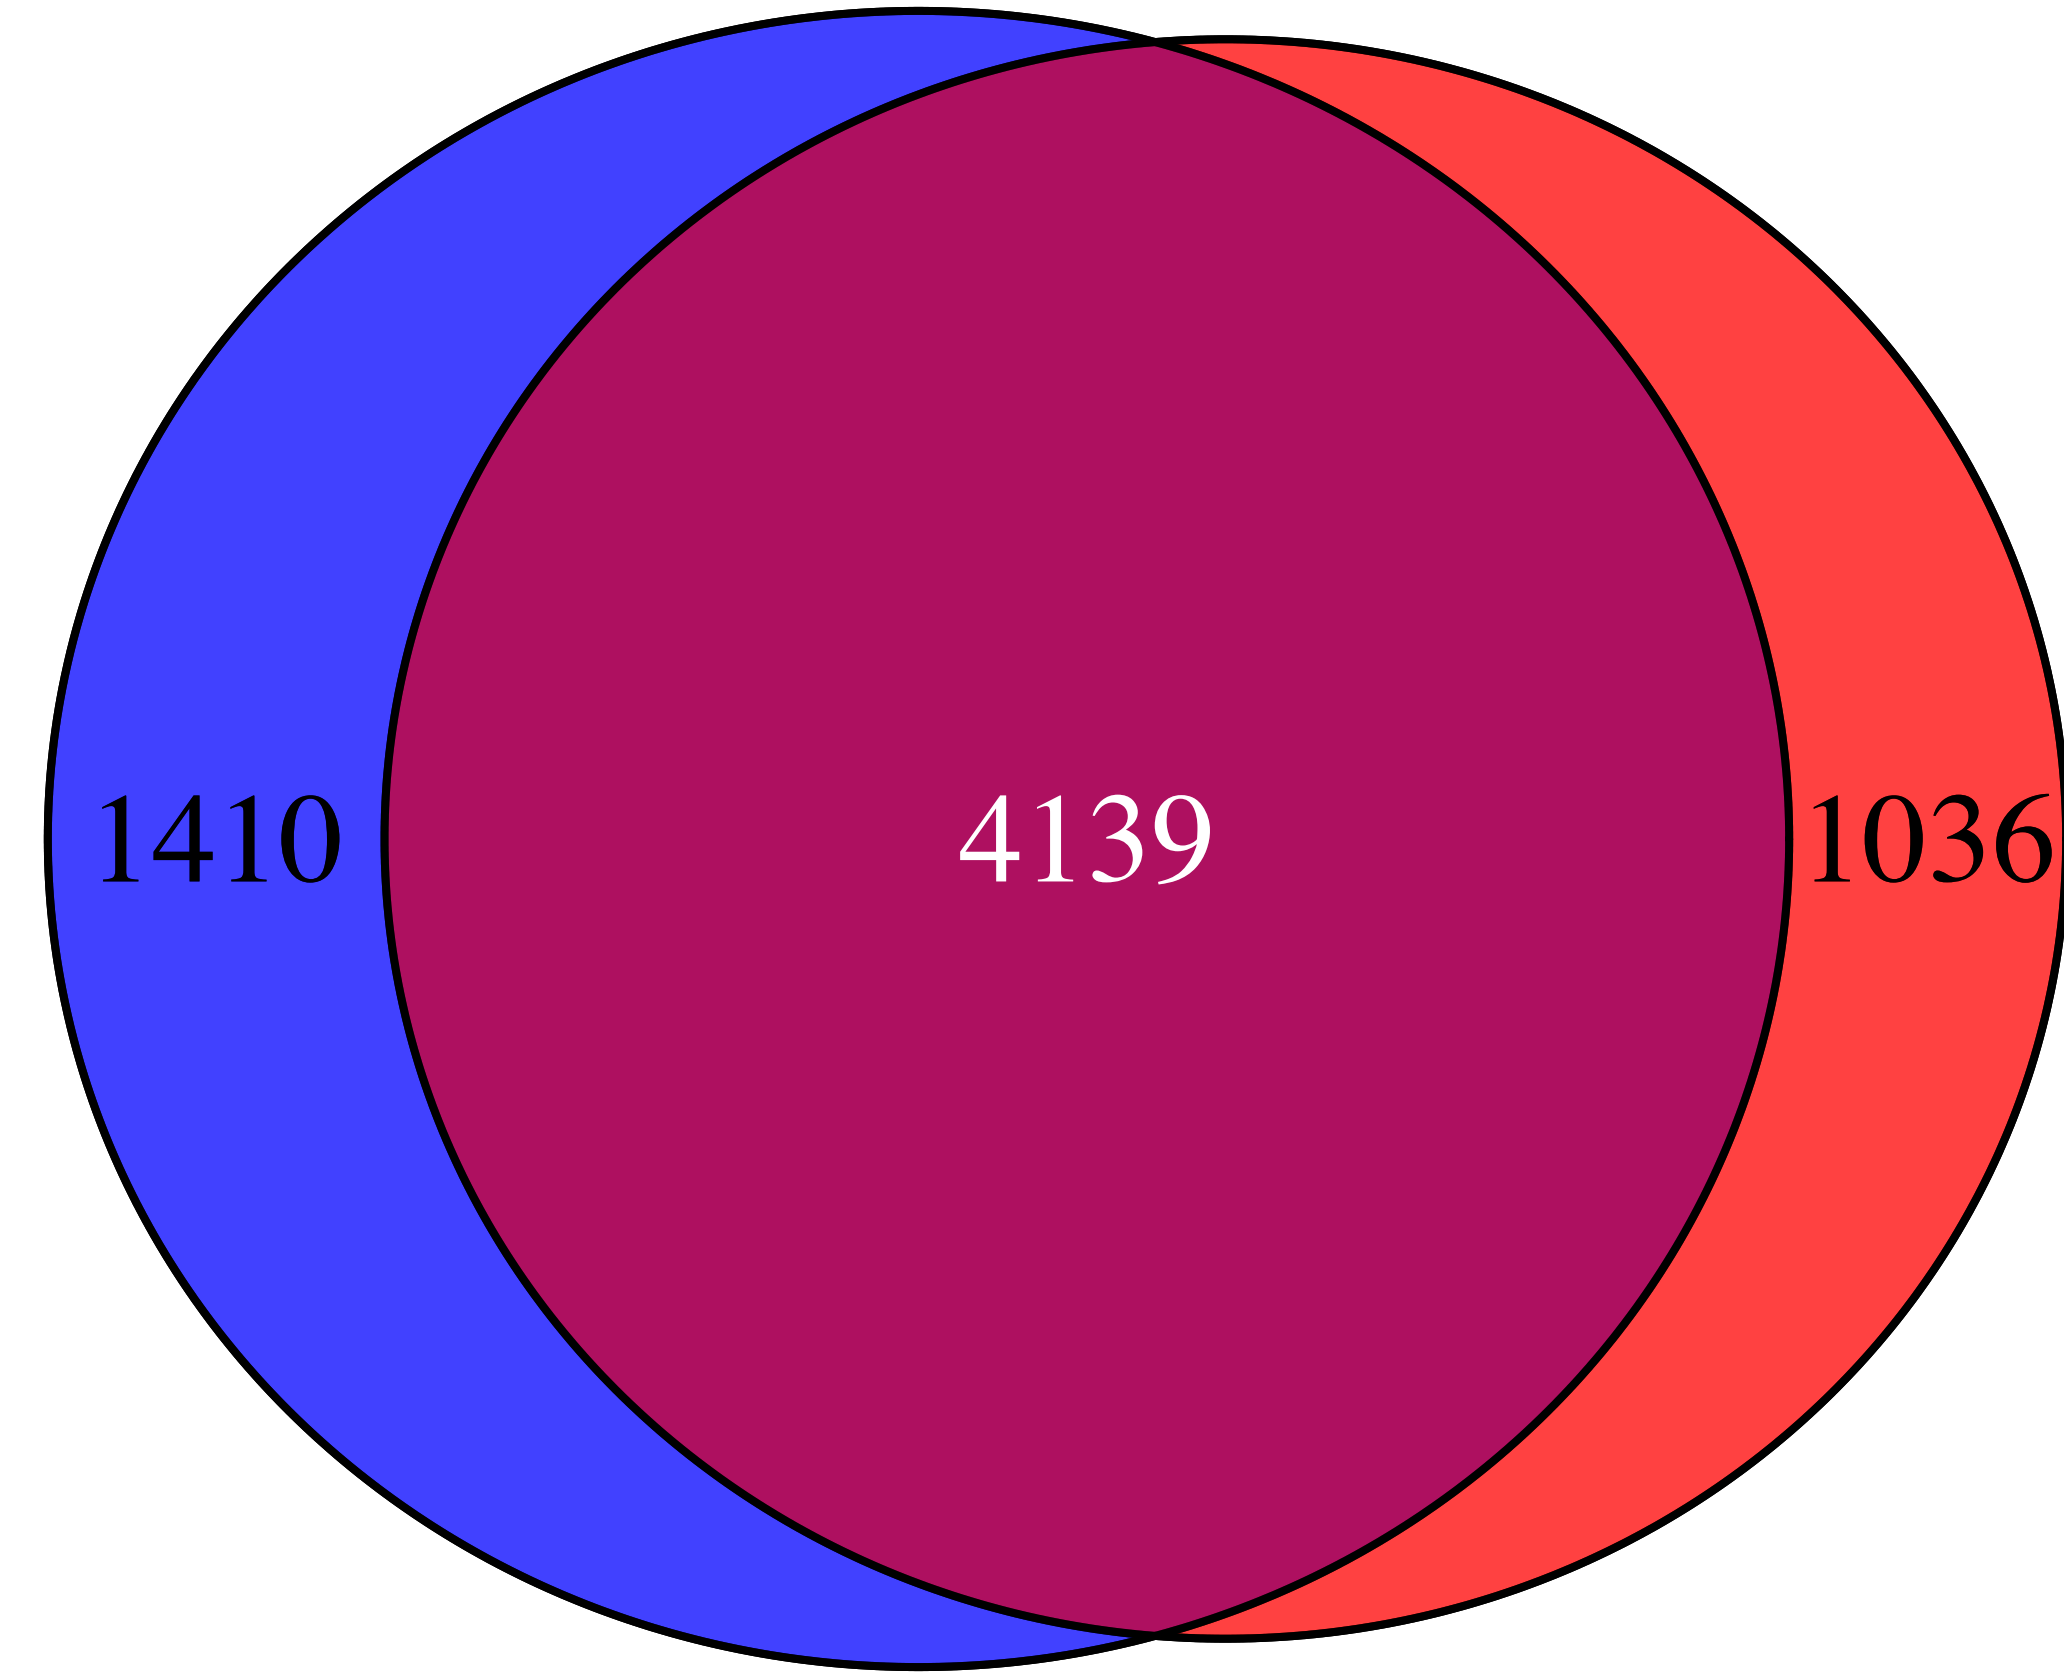

LF\_24h

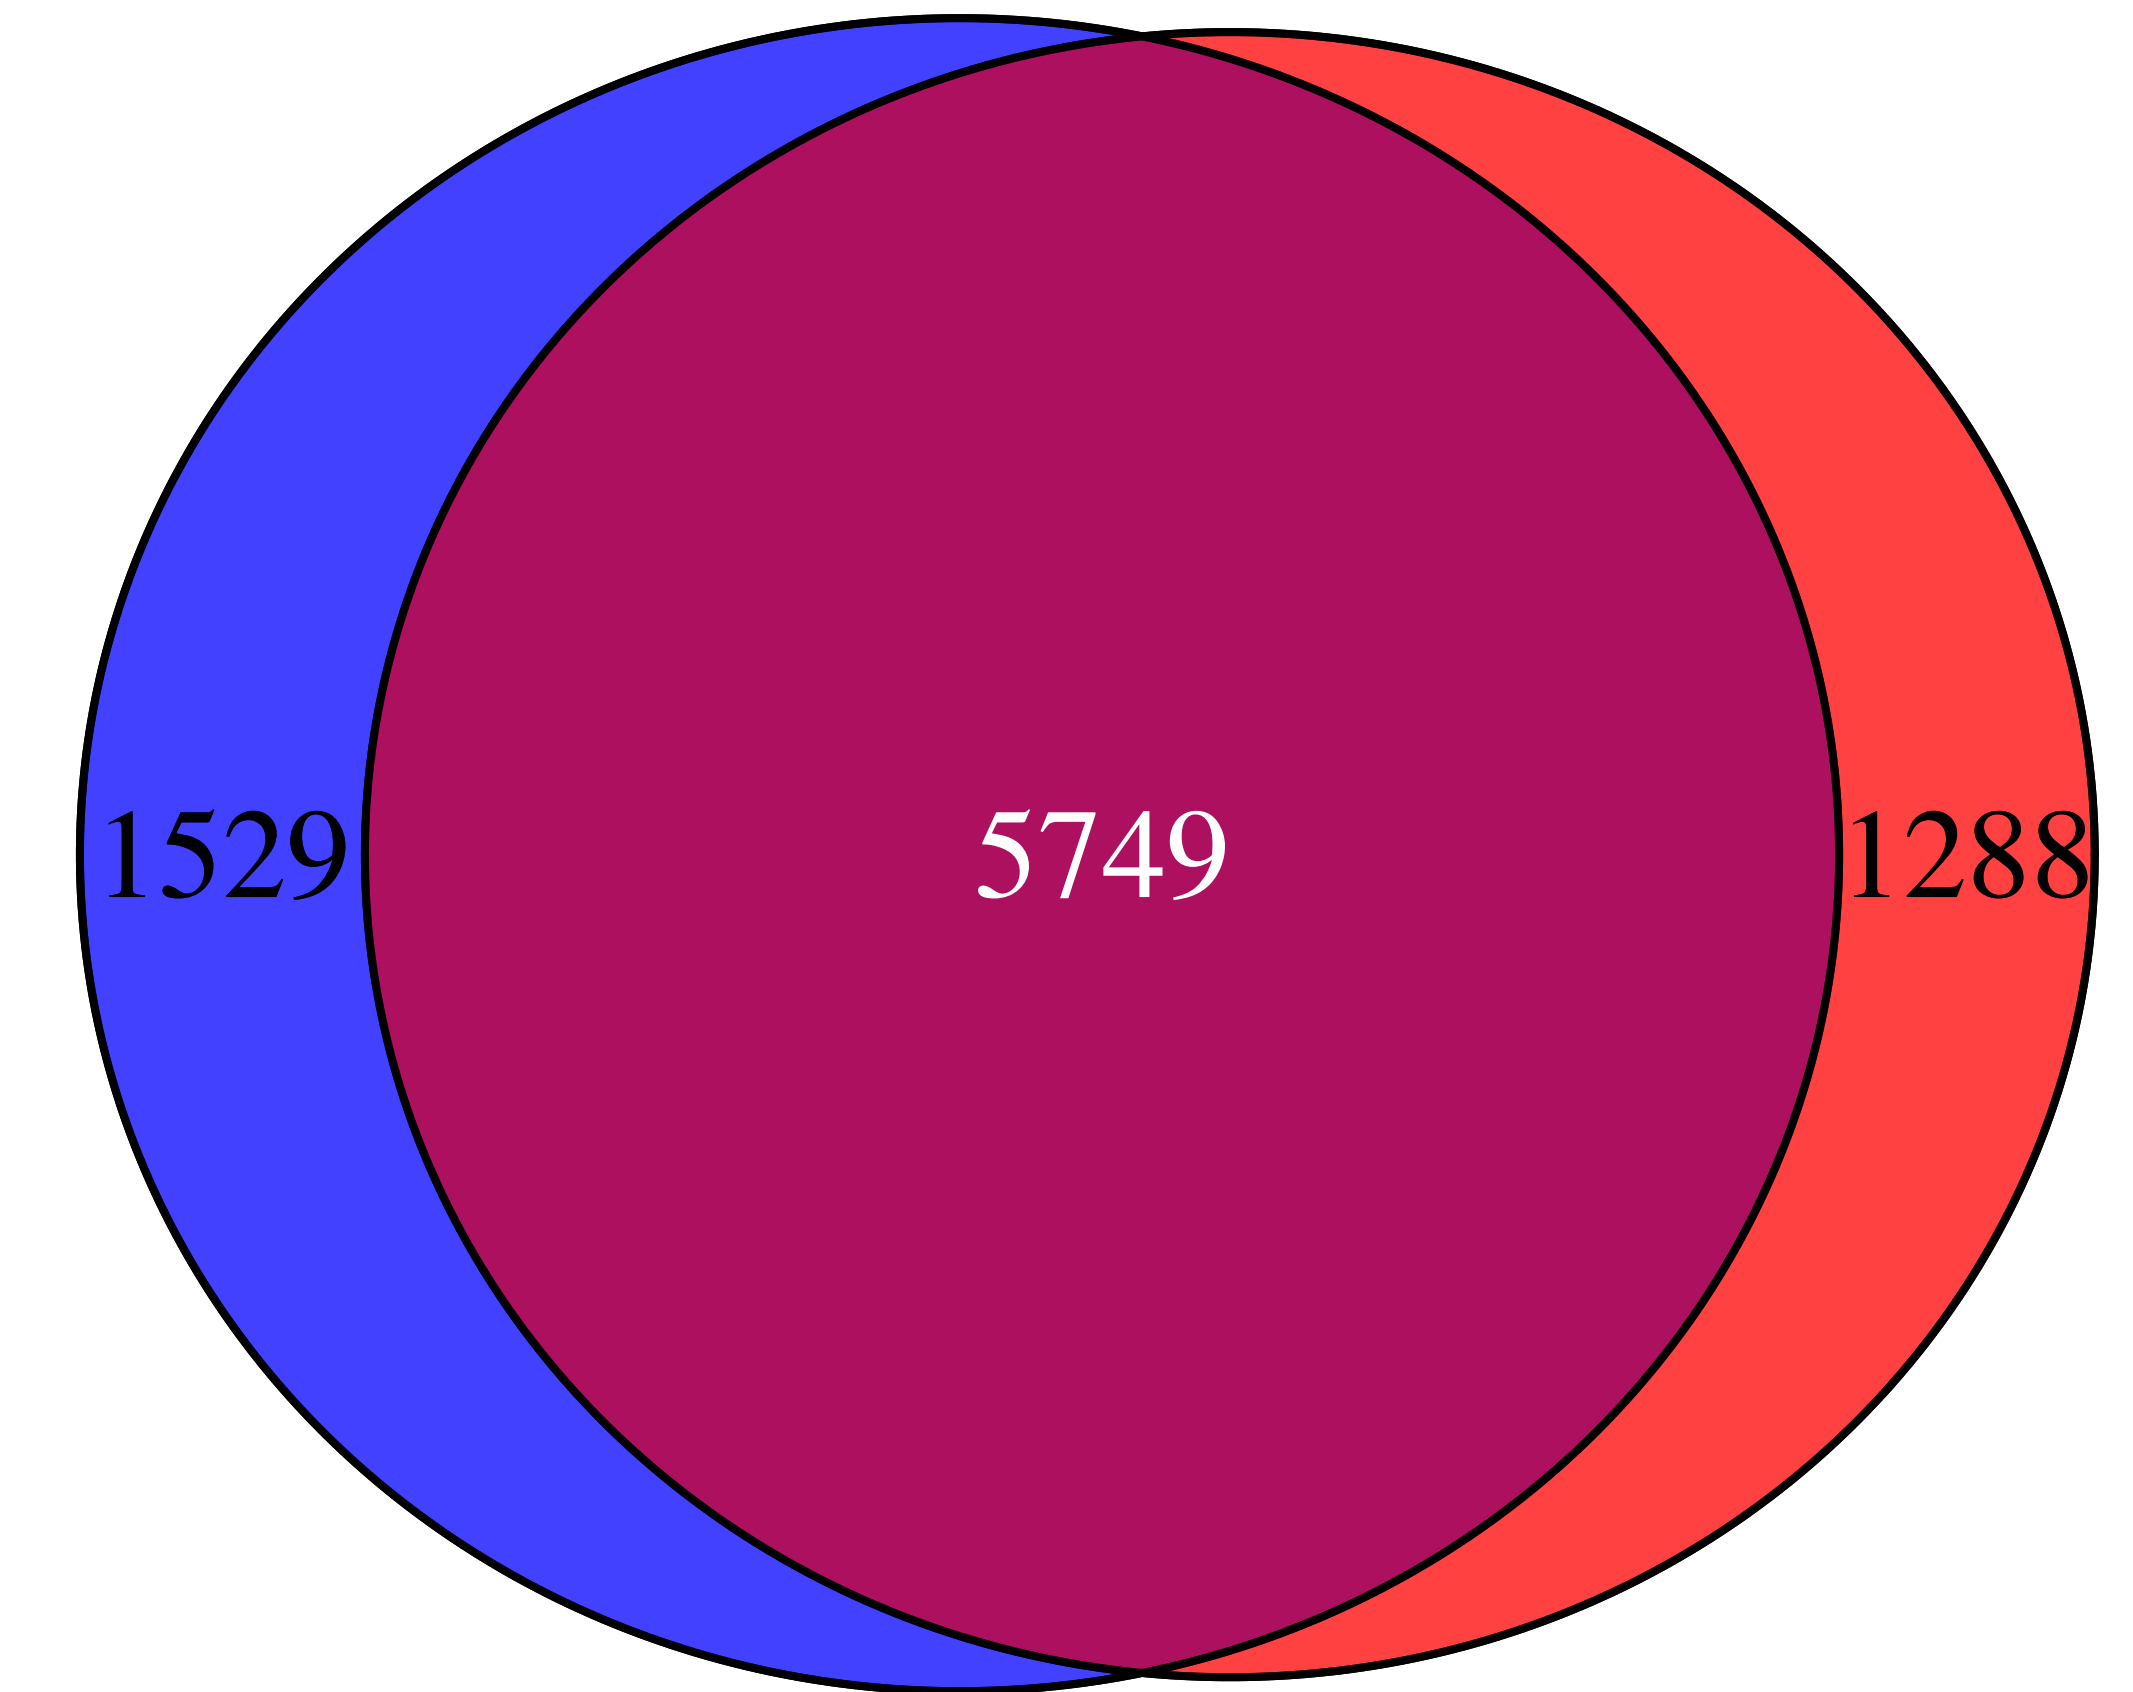

RT\_00h

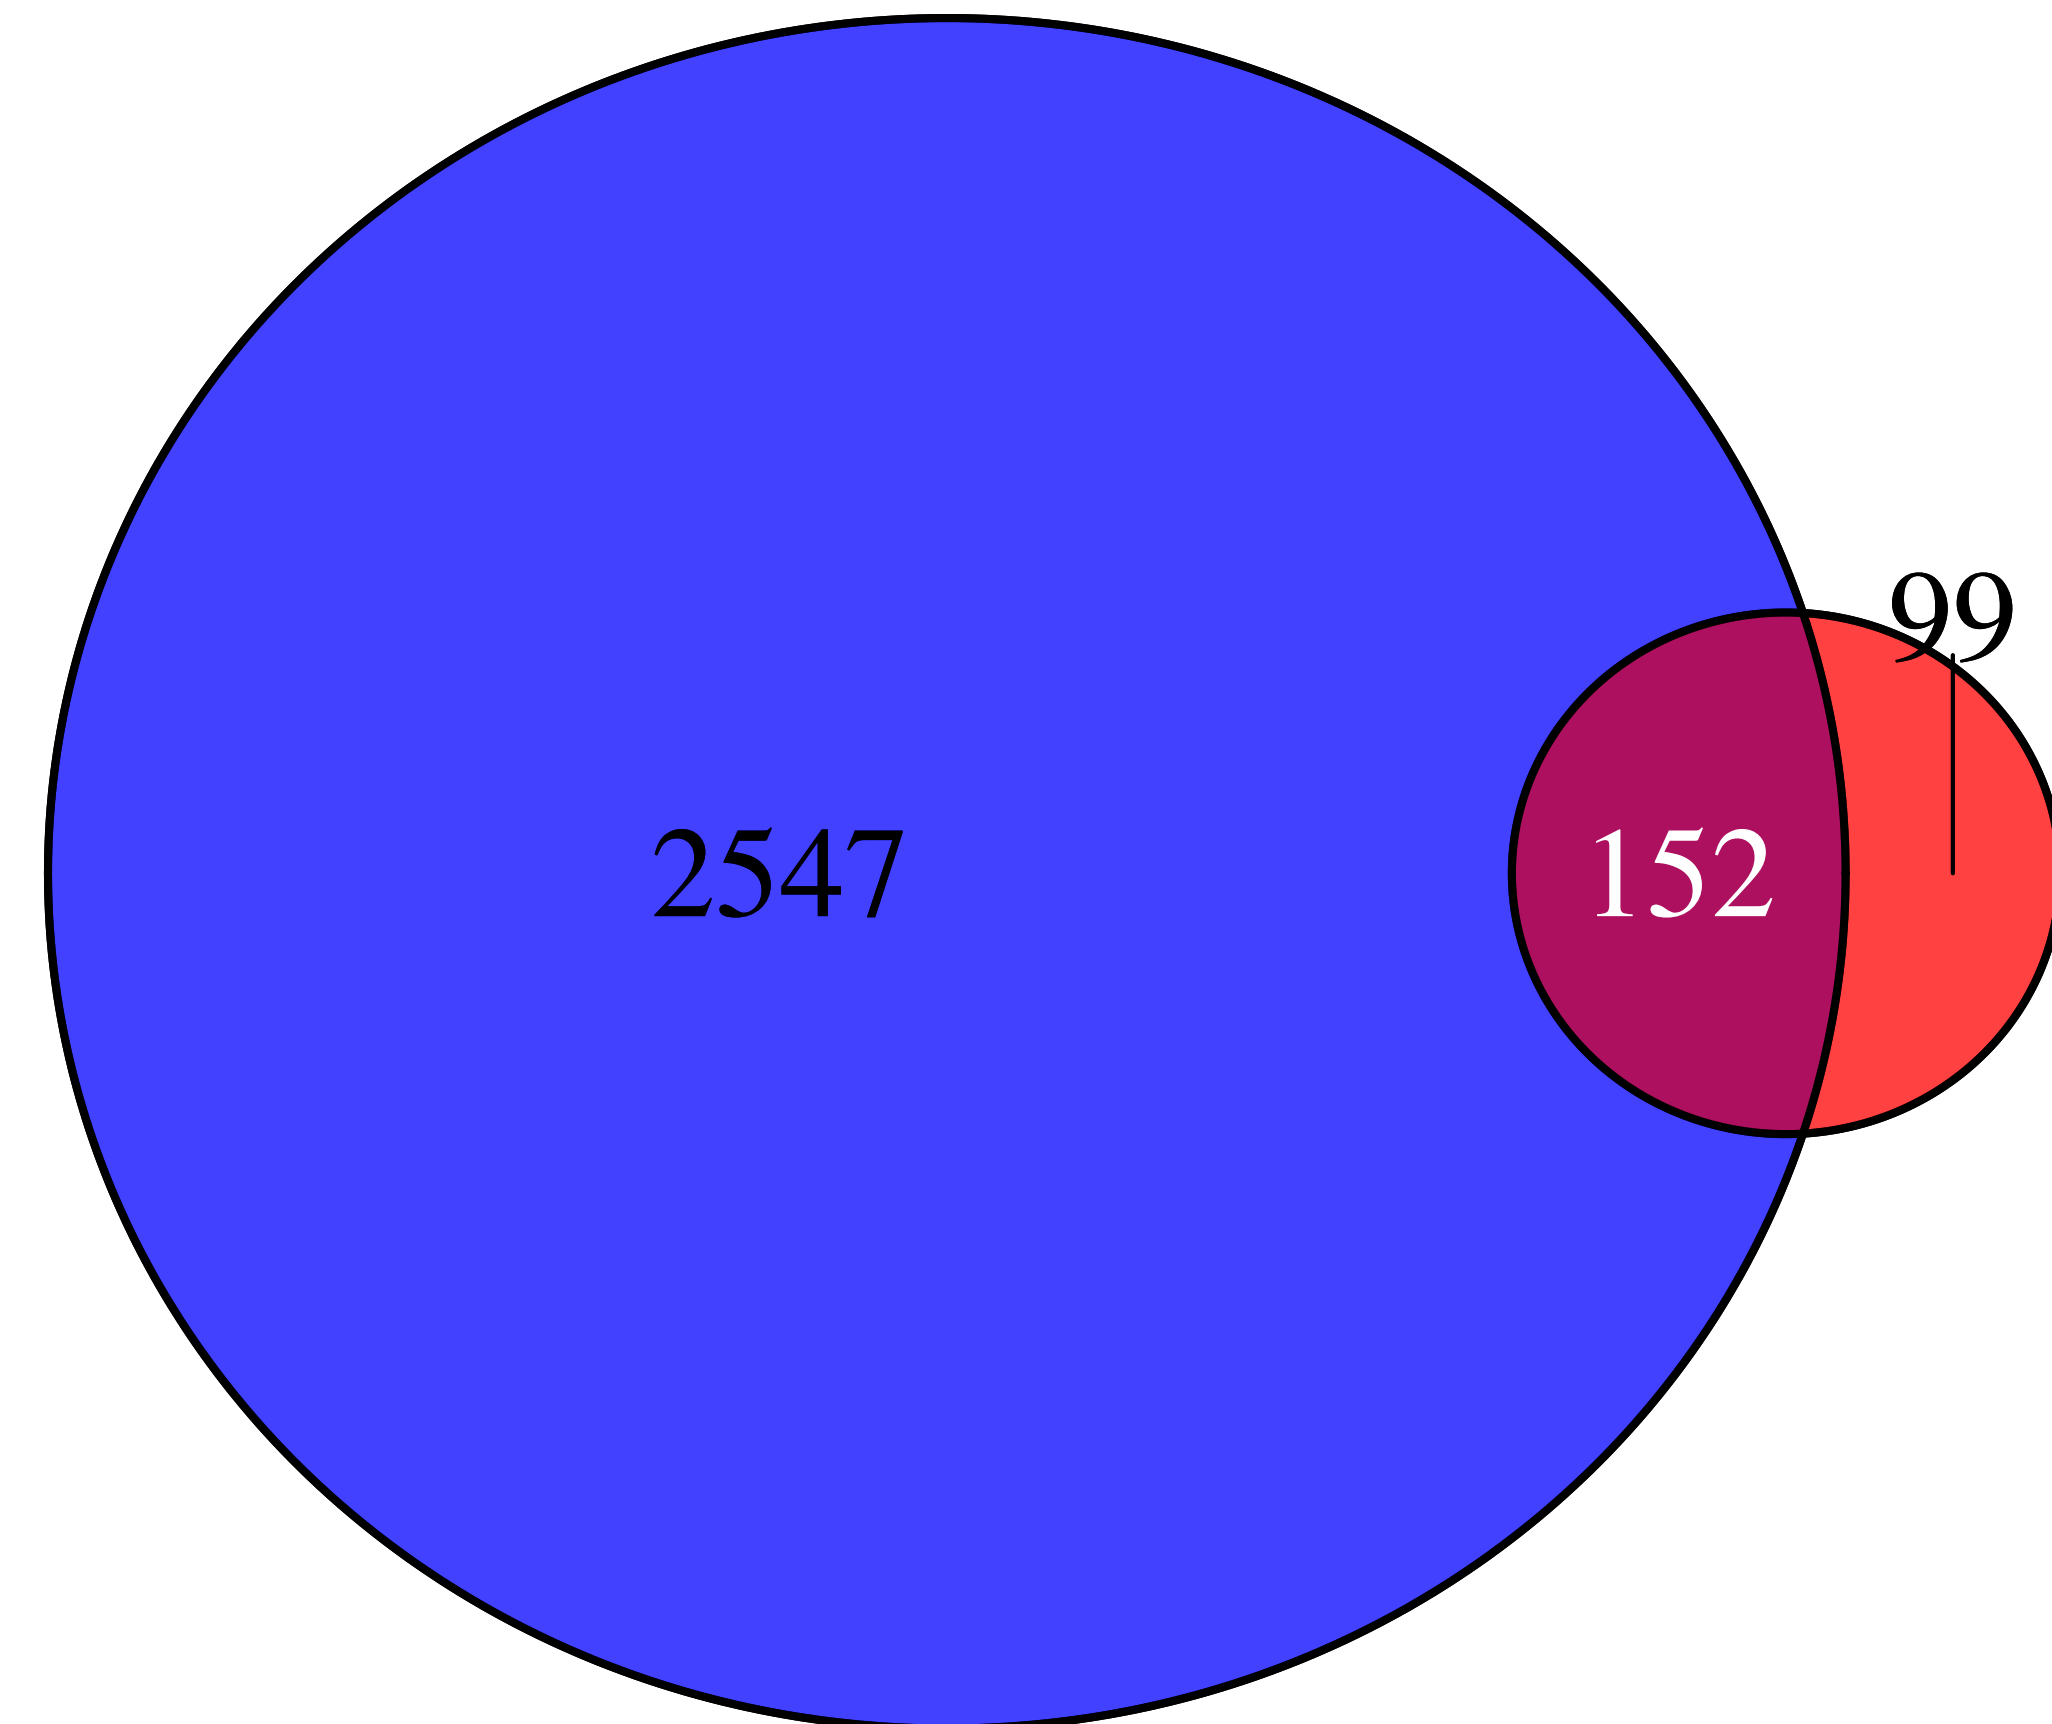

RT\_06h

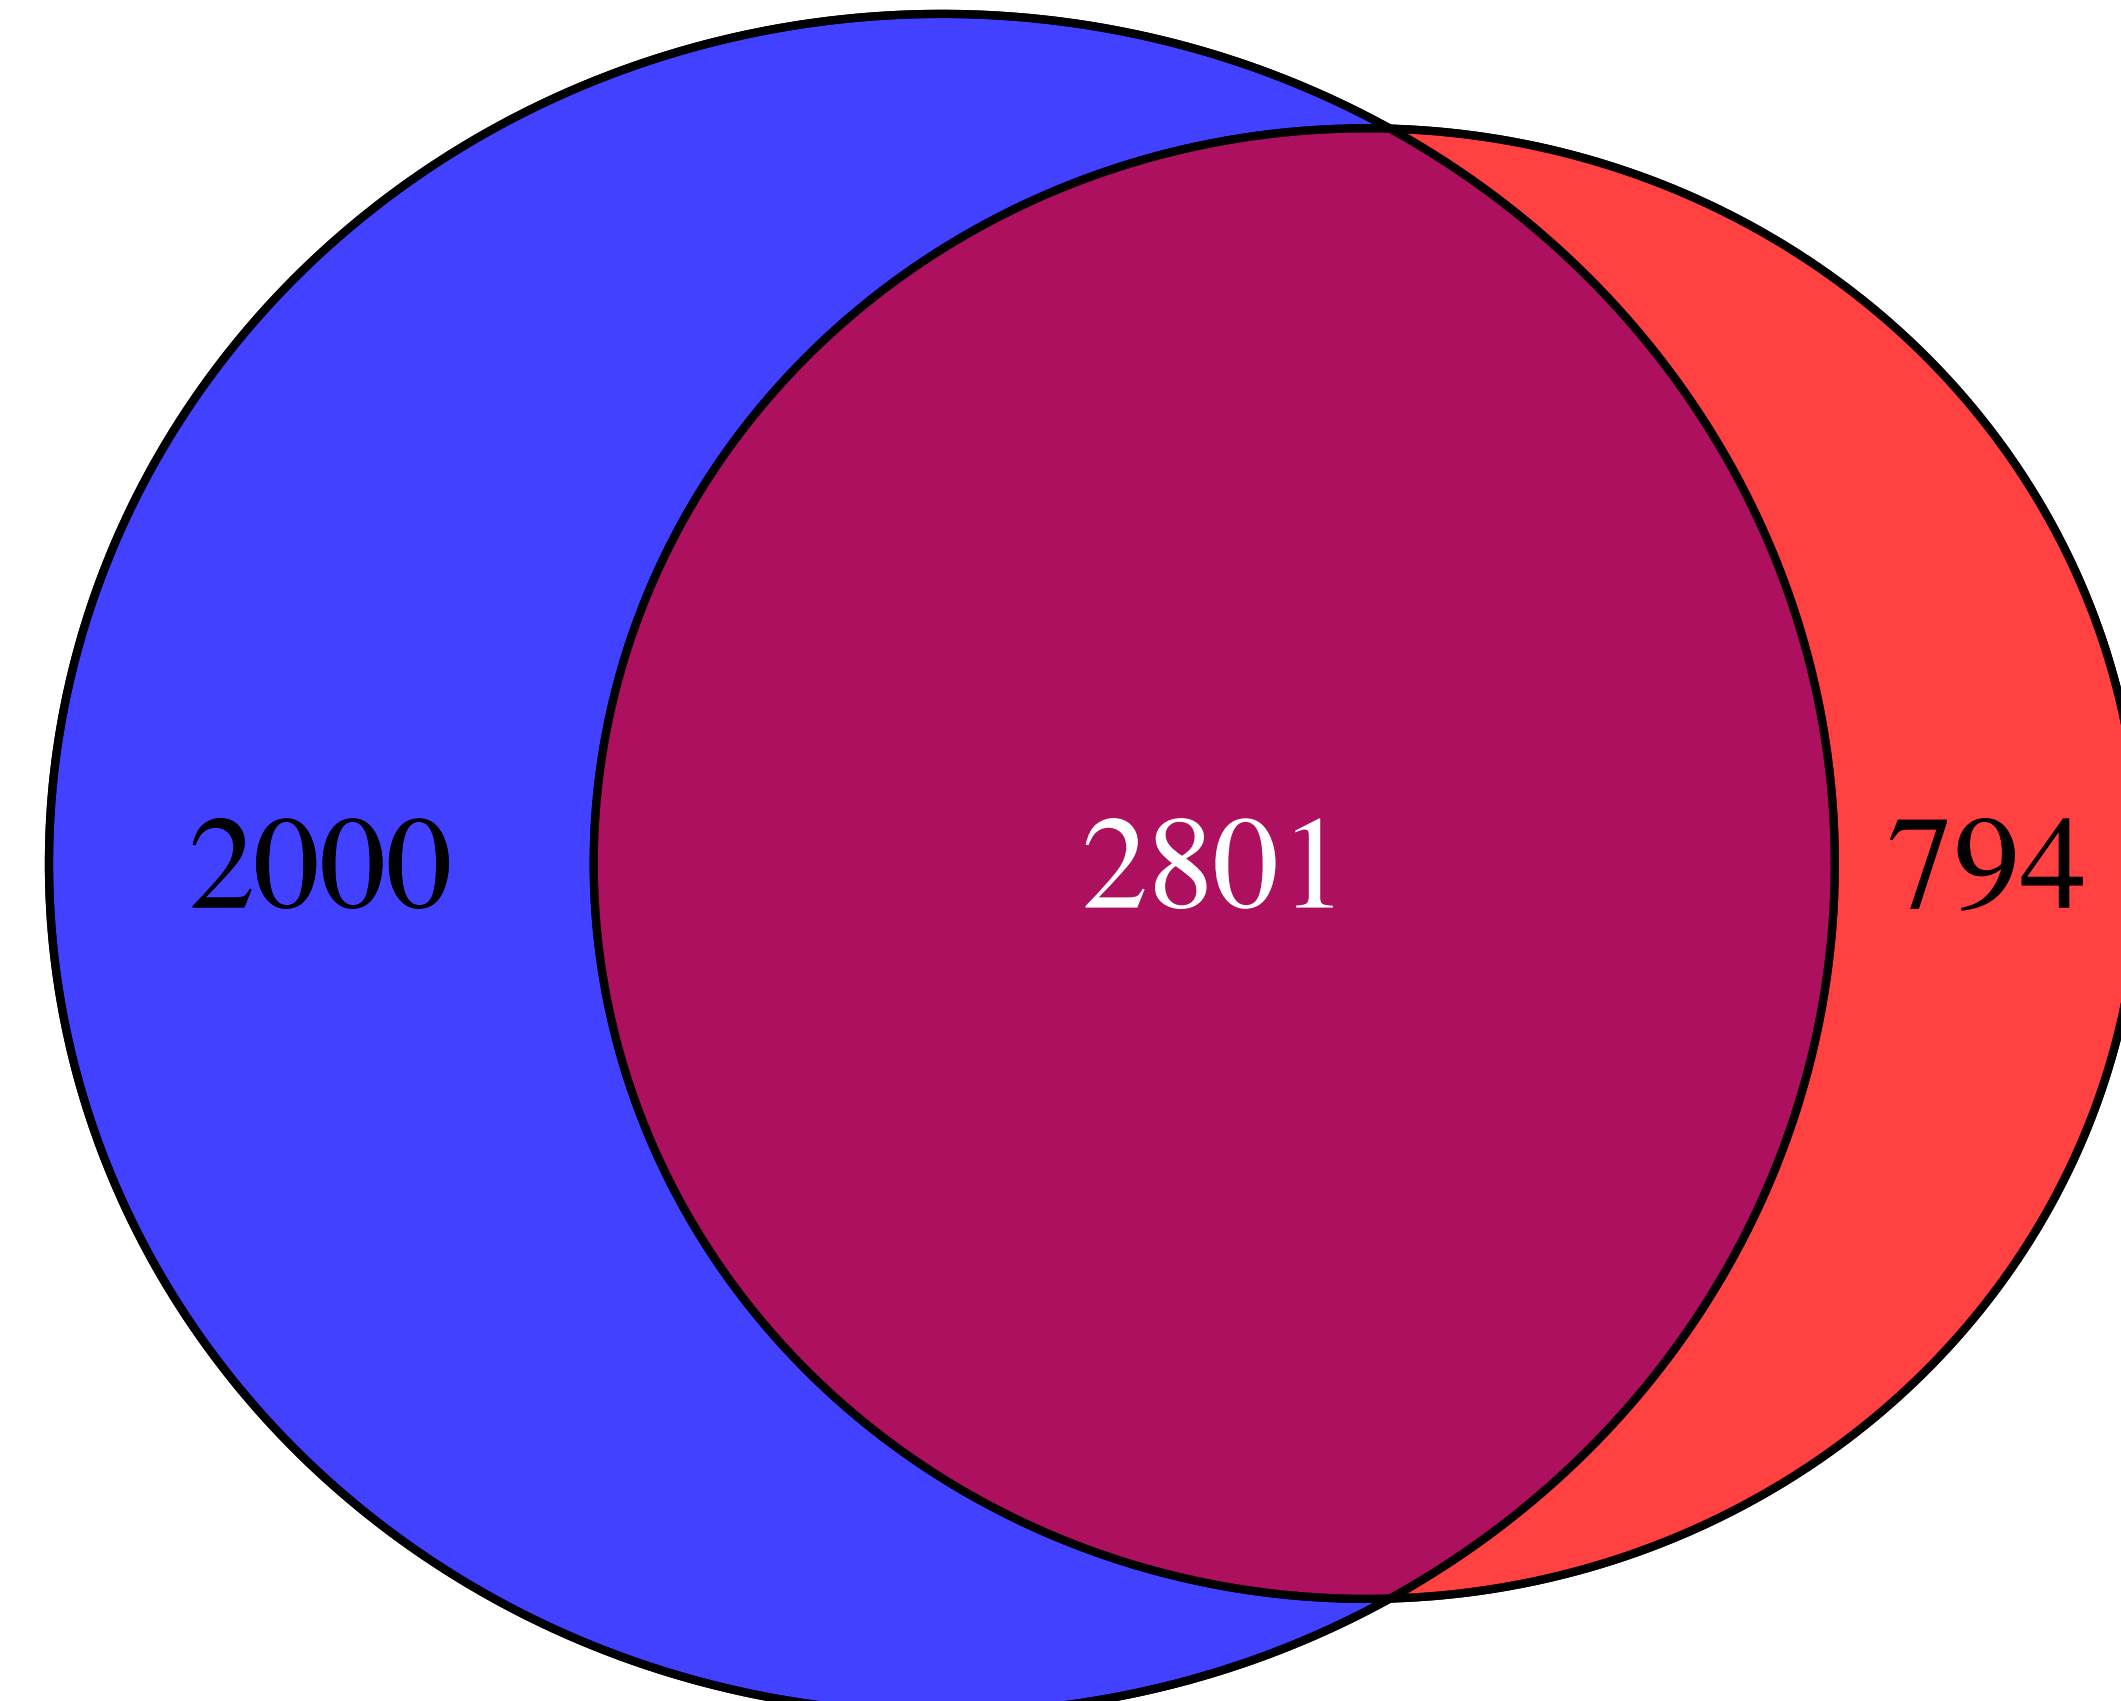

RT\_12h

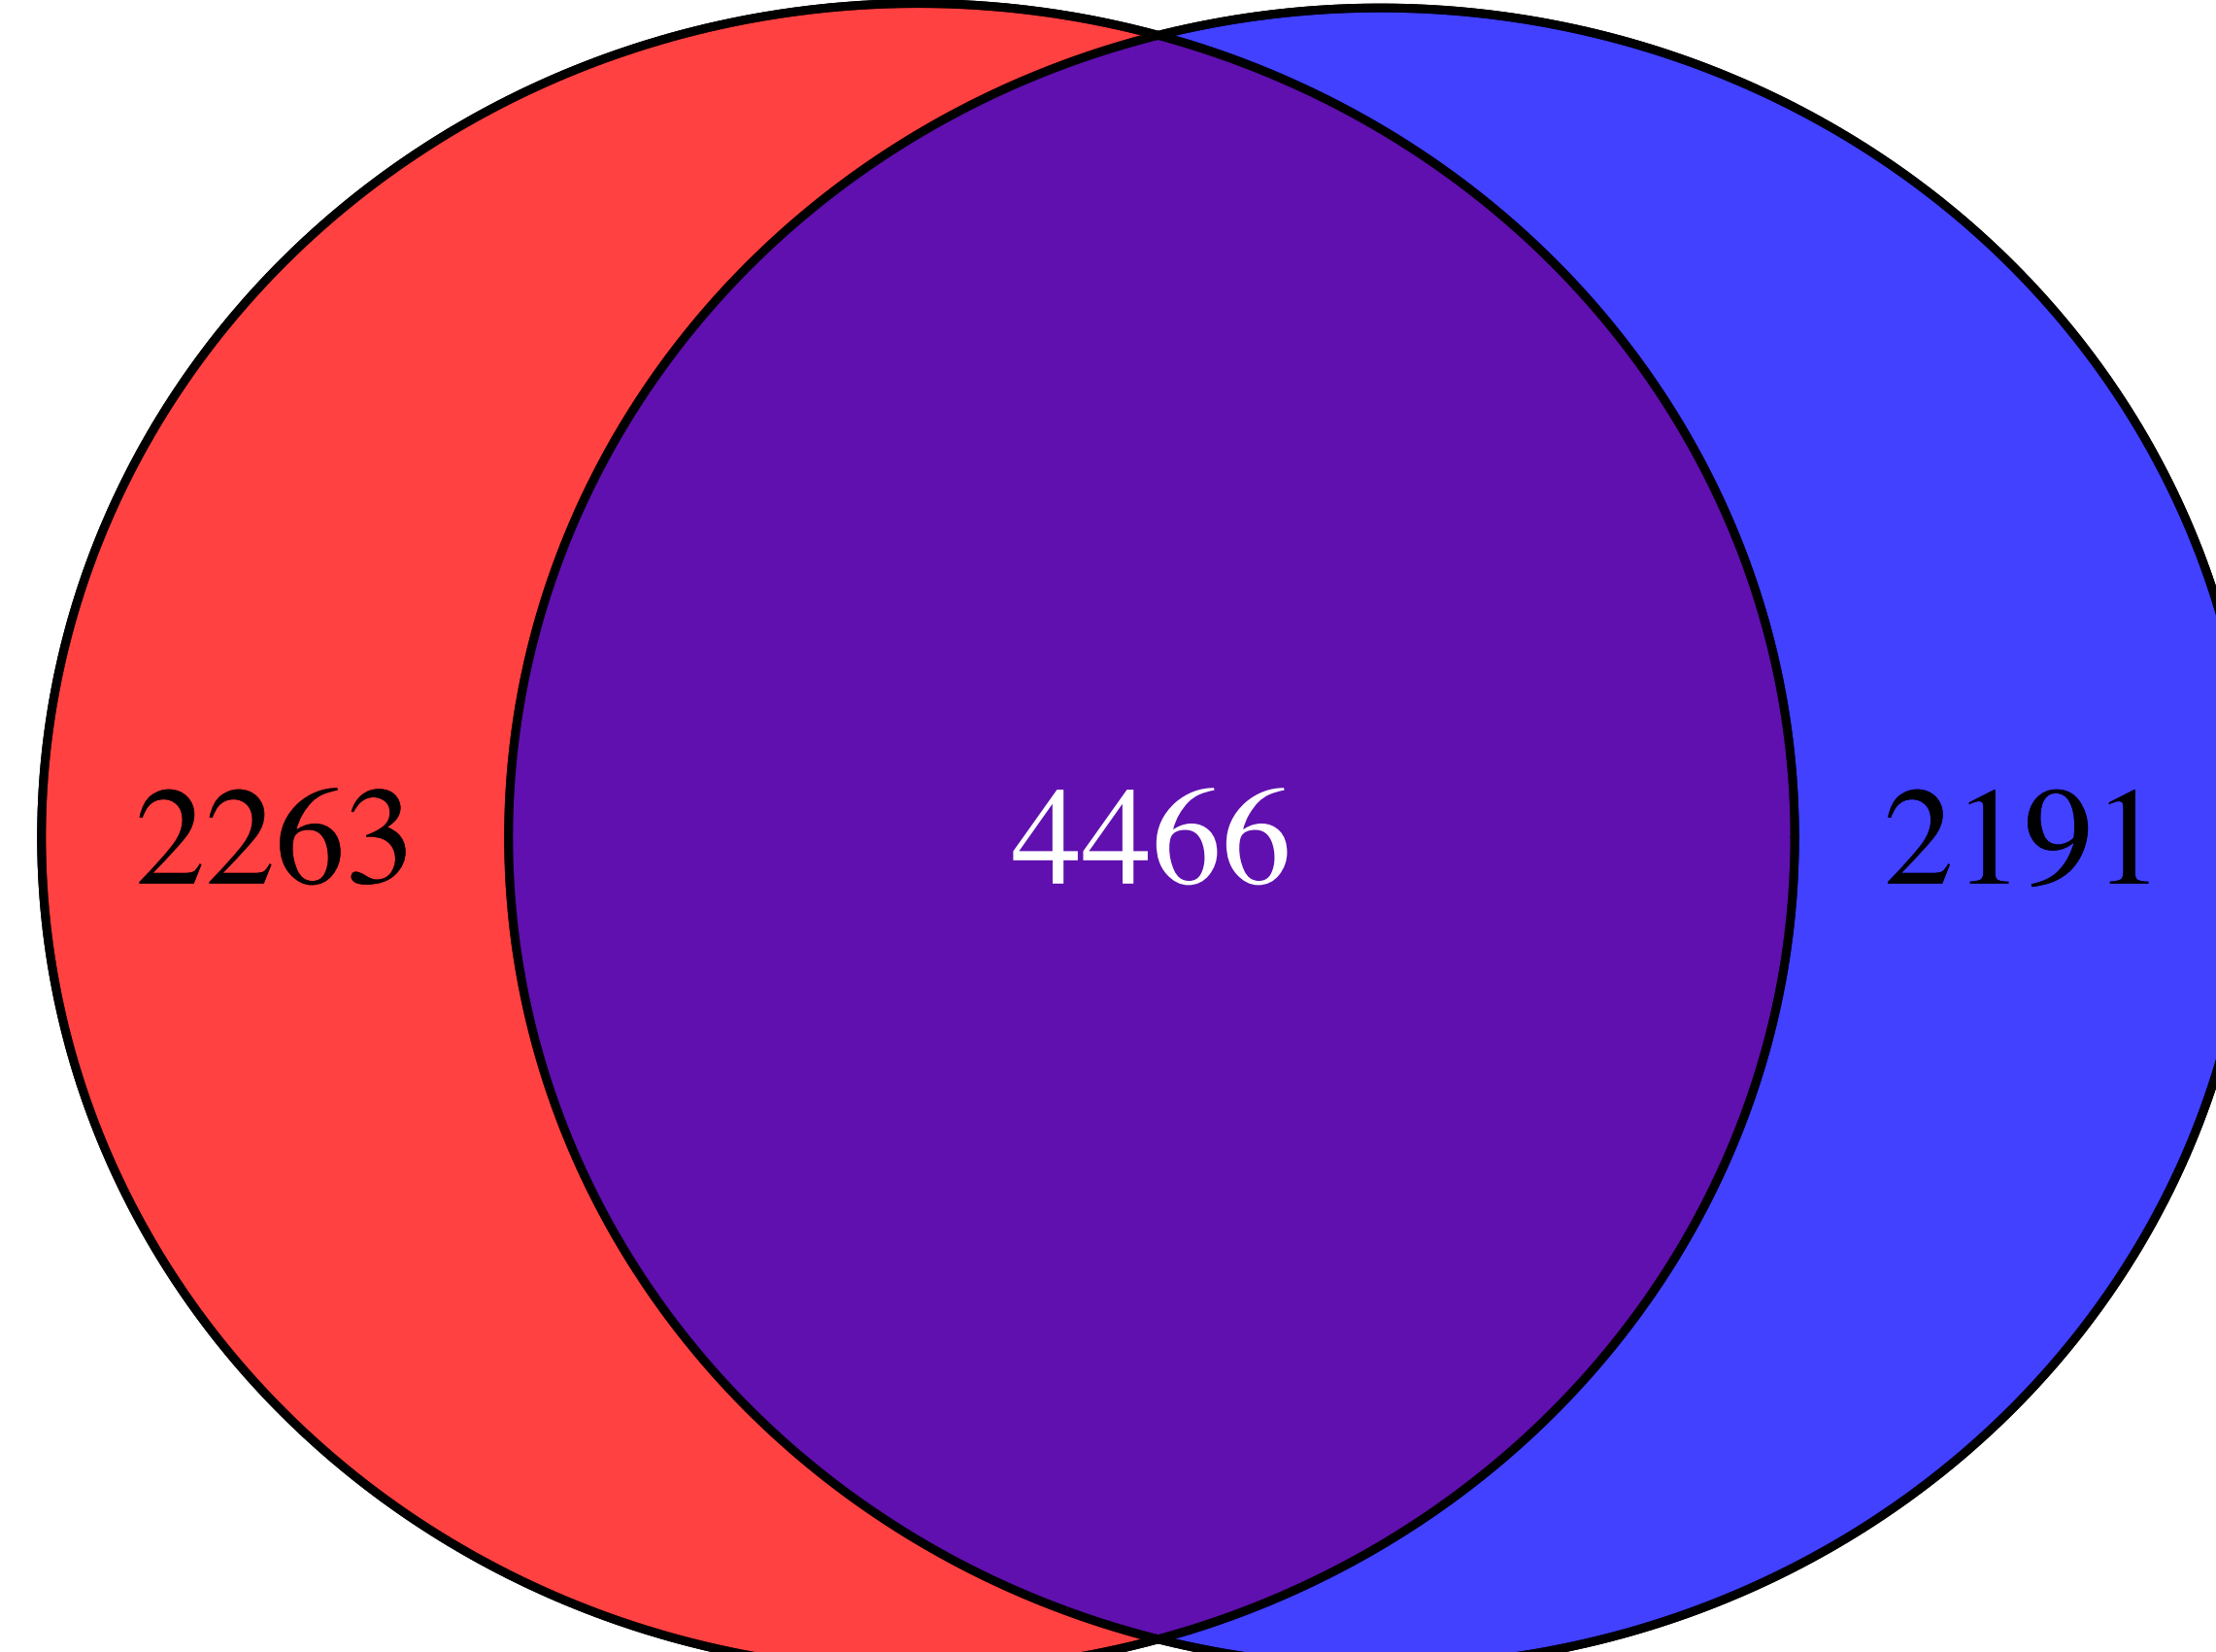

RT\_24h

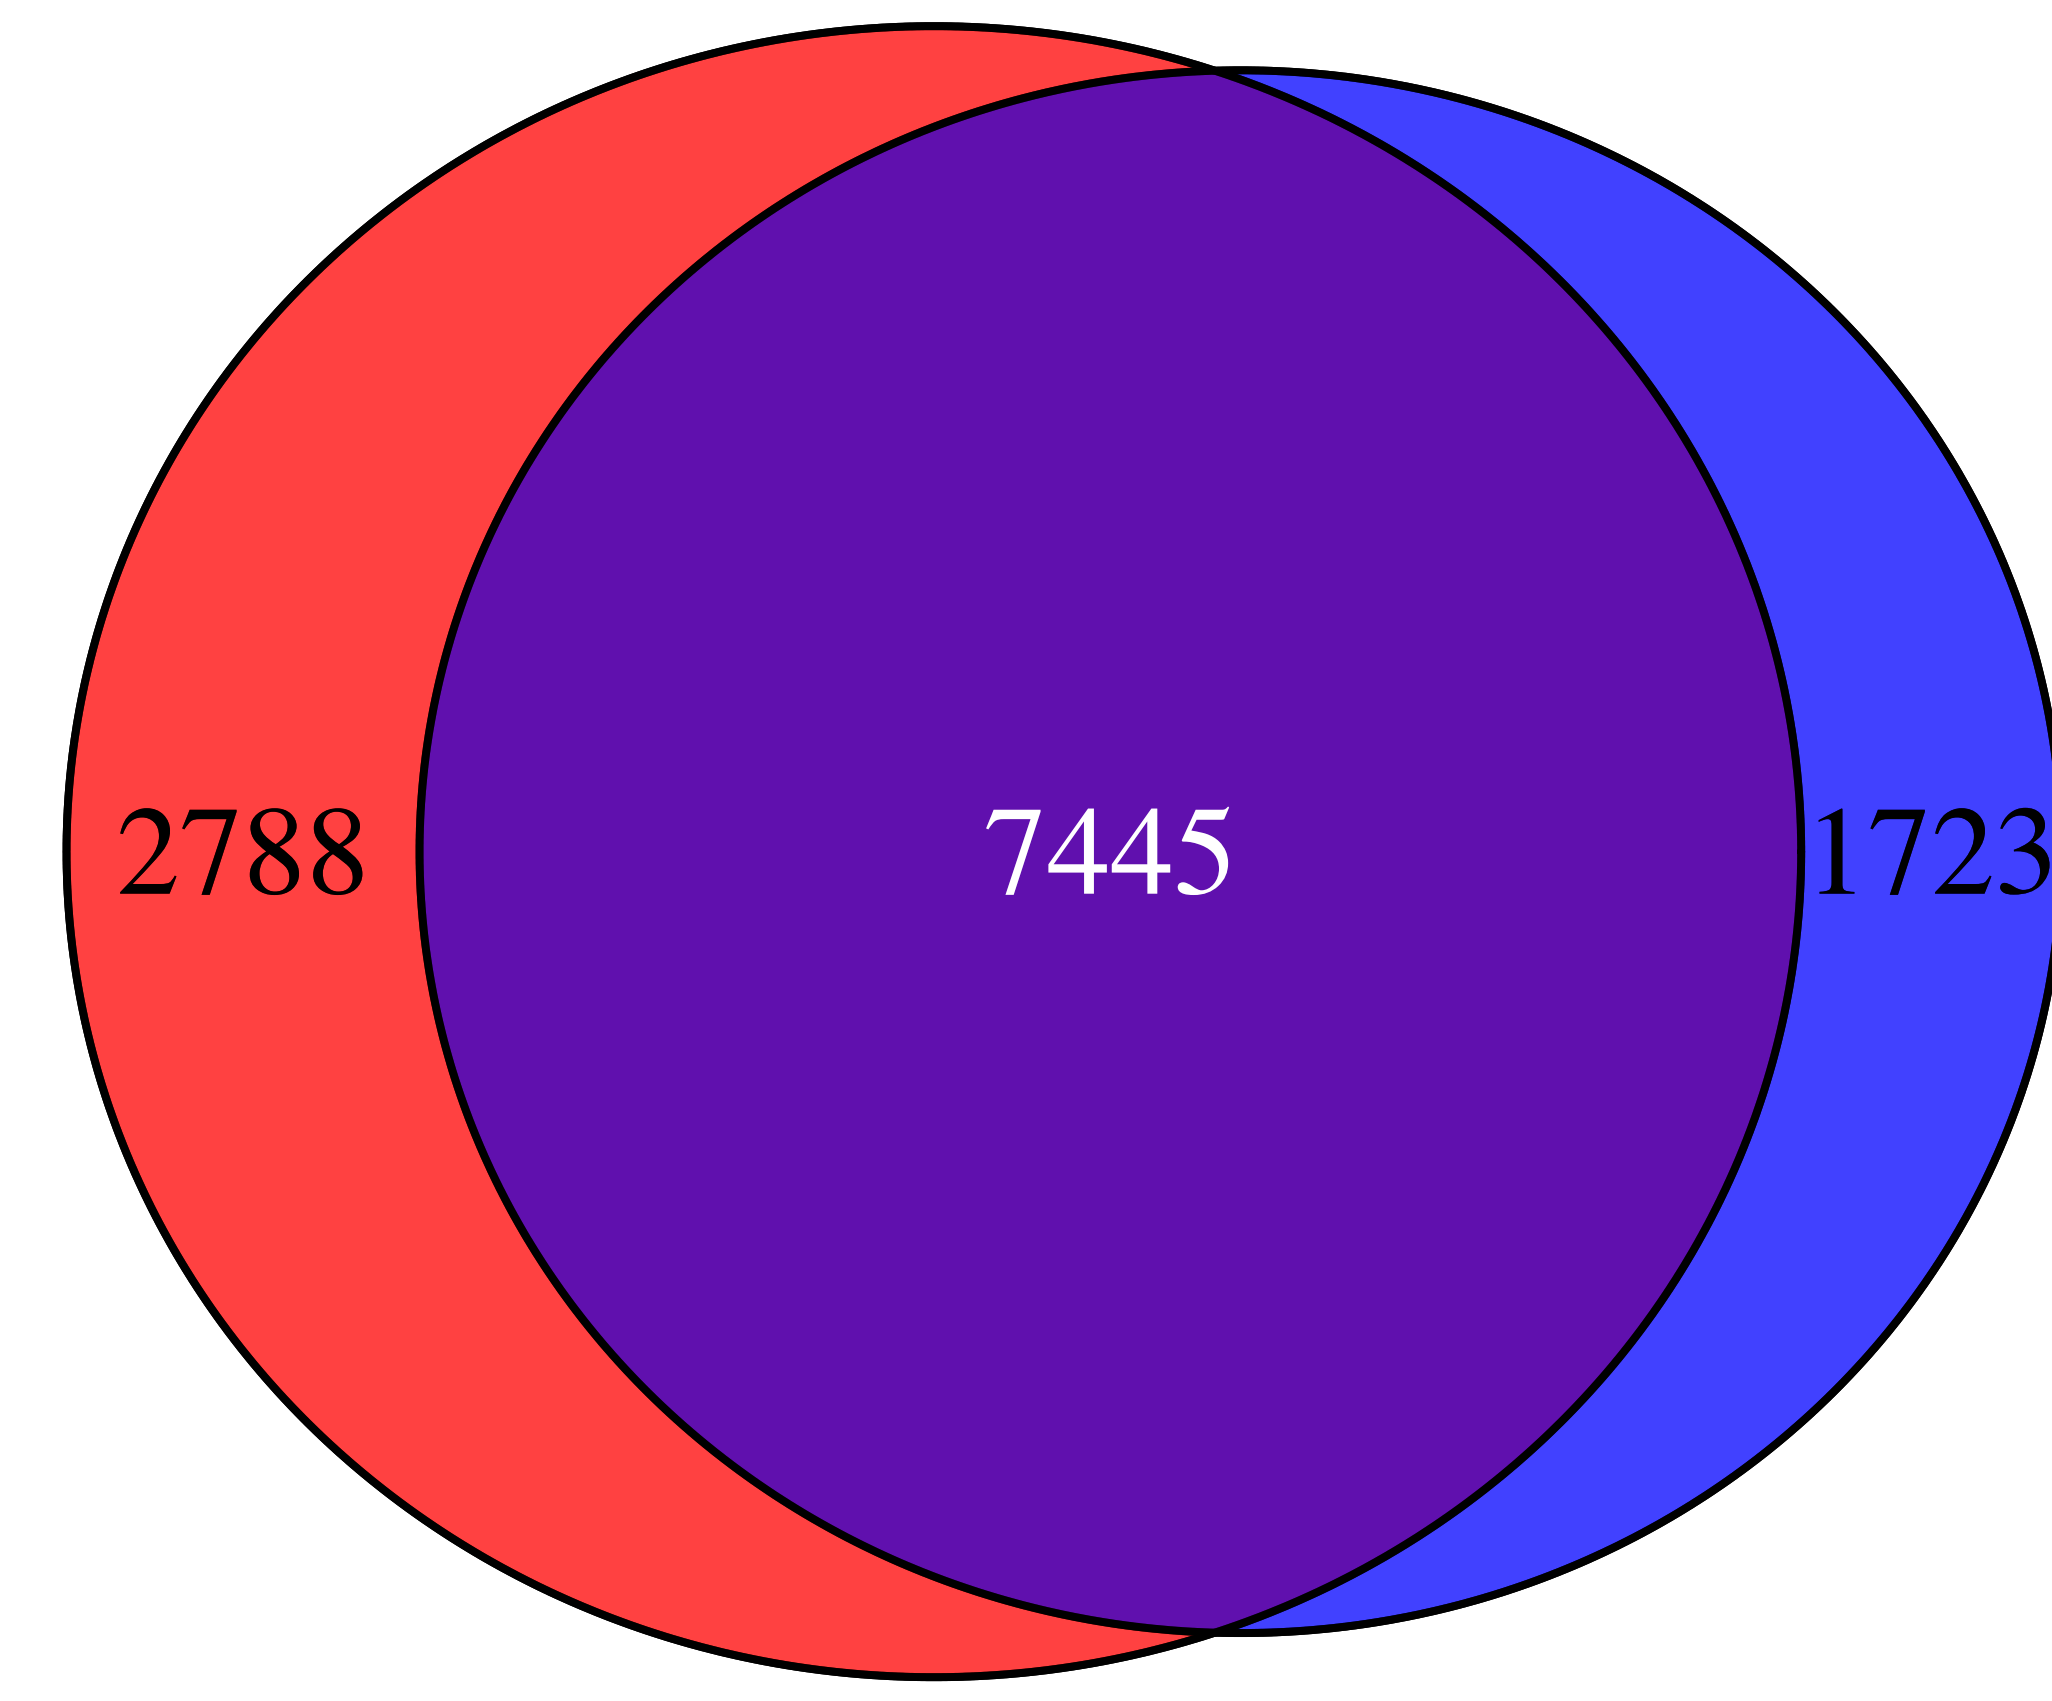

RT\_48h

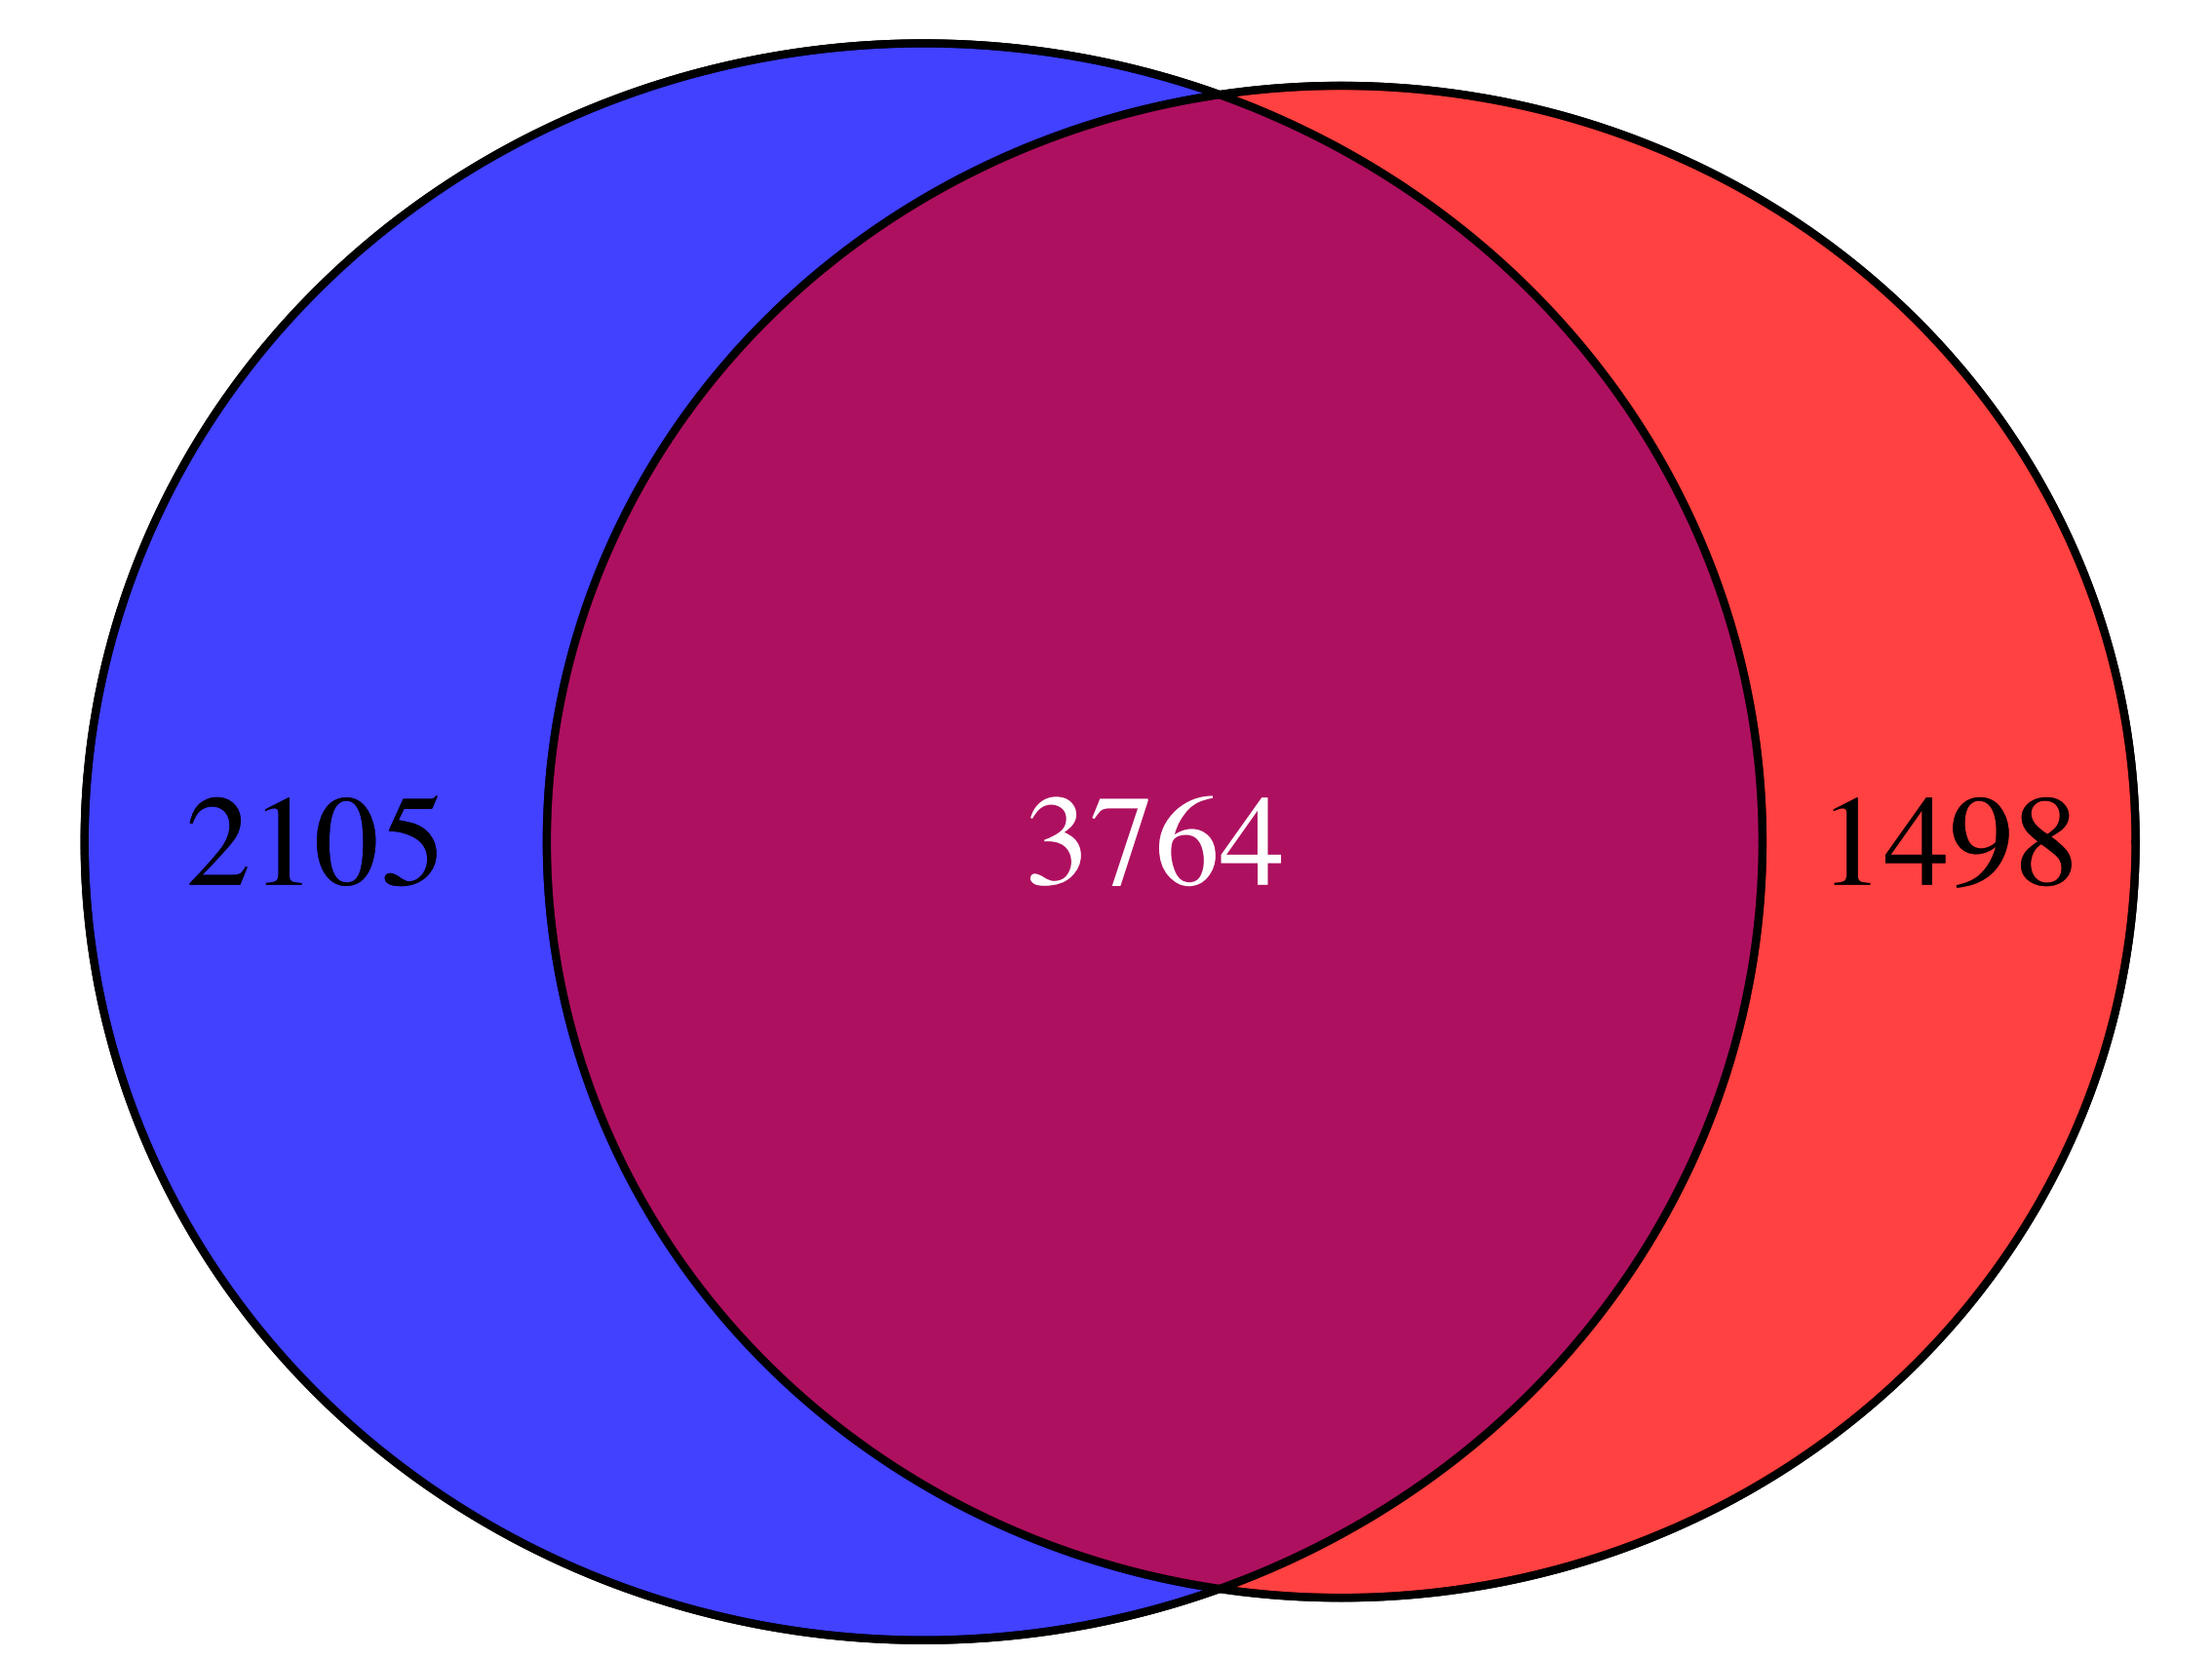

Supplement: s1 [file s1]

A

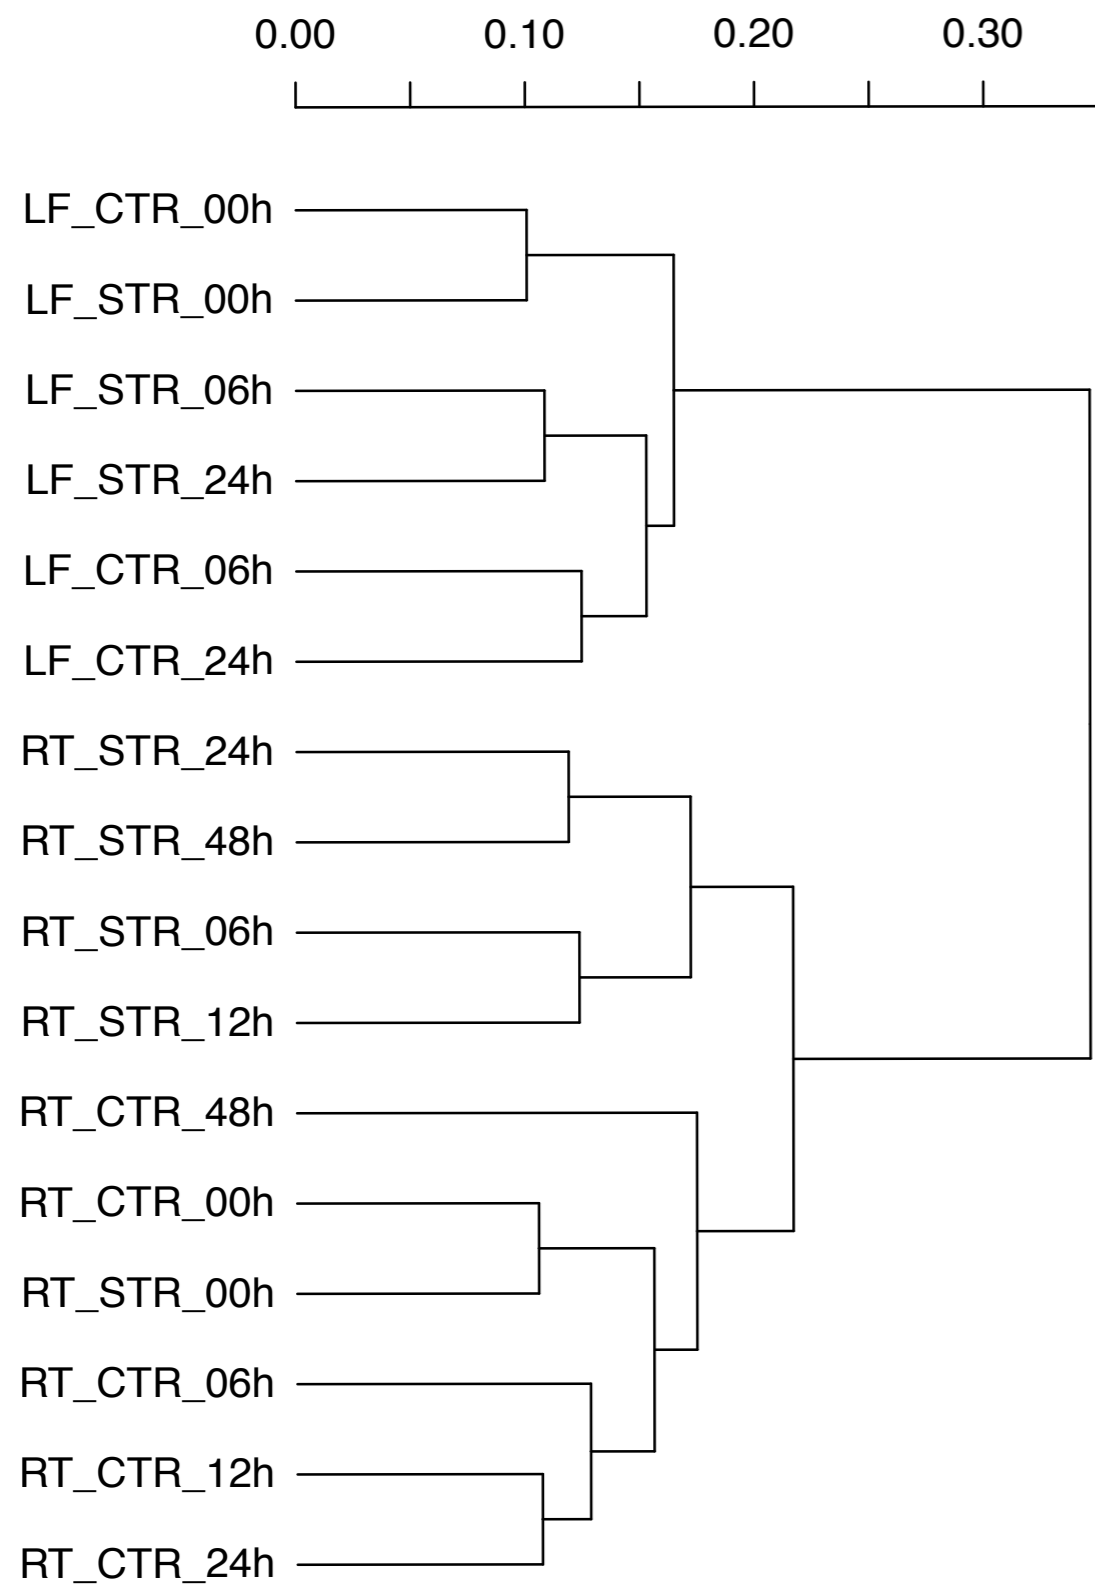

B

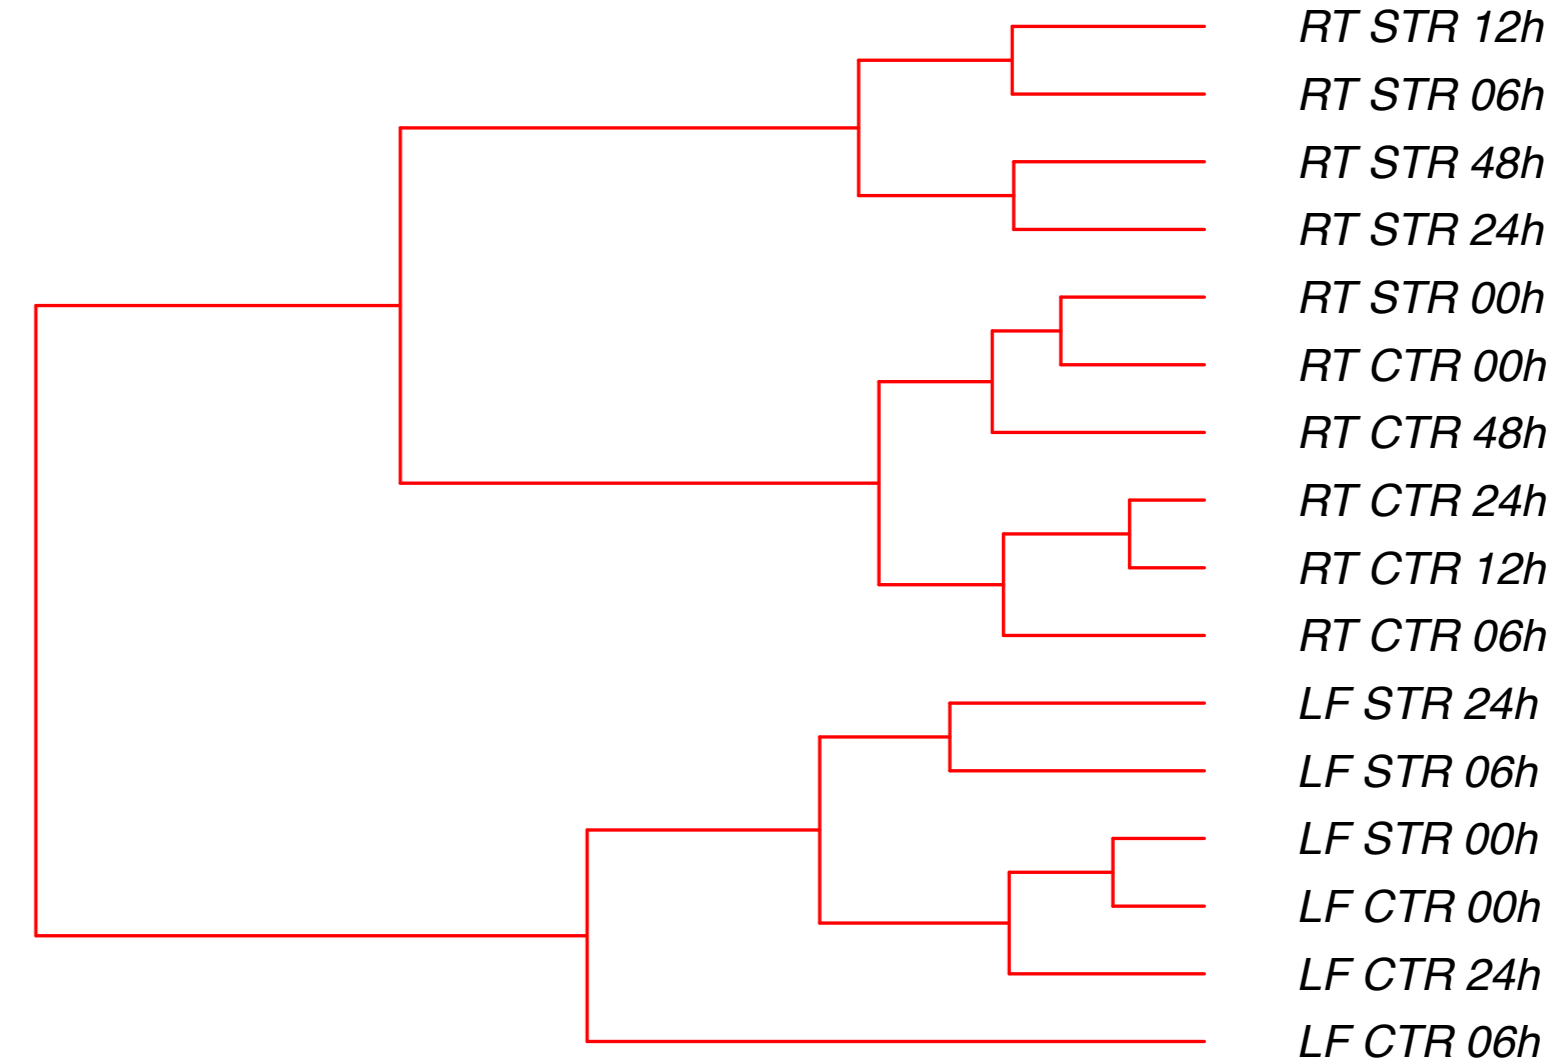

Supplement: s1 [file s1]
